# Supplementary material for: Identification of IGF-1-enhanced cytokine expressions targeted by miR-181d in glioblastomas via an integrative miRNA/mRNA regulatory network analysis
Source: PubMed Central journal article supplement (PMC5429683; doi:10.1038/s41598-017-00826-0), 2017-04-07

**Identification of IGF-1-enhanced cytokine expressions targeted by miR-181d in glioblastomas via an integrative miRNA/mRNA regulatory network analysis**

Kuo-Hao Ho<sup>1\*</sup>, Peng-Hsu Chen<sup>2\*</sup>, Edward Hsi<sup>3</sup>, Chwen-Ming Shih<sup>2,6</sup>, Wei-Chiao Chang<sup>4,5</sup>, Chia-Hsiung Cheng<sup>2,6</sup>, Cheng-Wei Lin<sup>2,6</sup>, Ku-Chung Chen<sup>2,6#</sup>

1. Department of Clinical Pharmacy, School of Pharmacy, Taipei Medical University, Taipei, Taiwan 2. Graduate Institute of Medical Sciences, College of Medicine, Taipei Medical University, Taipei, Taiwan 3. Graduate Institute of Biomedical Sciences, China Medical University, Taichung, Taiwan 4. Department of Clinical Pharmacy, Master Program for Clinical Pharmacogenomics and Pharmacoproteomics, School of Pharmacy, Taipei Medical University, Taipei, Taiwan 5. Department of Pharmacy, Taipei Medical University-Wanfang Hospital, Taipei, Taiwan 6. Department of Biochemistry and Molecular Cell Biology, School of Medicine, College of Medicine, Taipei Medical University, Taipei, Taiwan

\*These authors contributed equally to the work.

# Corresponding authors: Dr. Ku-Chung Chen

## **Supplementary Figure legends**

**Supplementary Figure S1. GSEAs with insulin-like growth factor (IGF)-1-associated differentially expressed genes (DEGs).** GSEA diagrams showing that the gene set related to cytokine-cytokine receptor interactions was enriched in IGF-1-upregulated patients from TCGA microarray (A) and RNA Seq (B) data. The 48 and 32 core enrichment genes in (A) and (B) were identified in the leading edge subset.

**Supplementary Figure S2. Endogenous levels of miR-181d in miR-181d-overexpressing cells.** After cells were transfected with the indicated doses of miR-181d-expressing plasmids or empty pCDH vectors for 24 h, relative levels of miR-181d were measured with a real-time PCR. The miR-191-5p level was used as an internal control. Data are the mean  $\pm$  SD of three experiments.

**Supplementary Figure S3. The effects of IGF-1-miR181d-cytokines axis on glioma cell growth and invasion.** (A) The effect of IGF-1 on U87-MG cell growth. After cells were treated with 100 ng/ml IGF-1 for 24 h, the cell growth was measured by MTT assays. (B and C) The effects of IGF-1, IL1b, CCR1, and miR-181d on U87-MG and M059K cell invasion. After cells were respectively treated with 100 ng/ml IGF-1, 10ng/ml IL1b, or transfecting with CCR1 and miR-181d overexpressing plasmids, the cell invasion changes were measured by matrigel invasion assays. (D) Overexpression of CCR1 genes. After cells were transfected with 1 $\mu$ g pcDNA3-CCR1 plasmids, the CCR1 protein levels were measured by immunoblotting assays.

**Supplementary Table S1. Gene set enrichment analysis of IGF-1-associated DEGs in microarray**

| Enrichment gene set                          | Number of genes | NES      | <i>p</i> . value | FDR      |
|----------------------------------------------|-----------------|----------|------------------|----------|
| Cytokine-cytokine receptor interaction       | 125             | 1.795177 | 0.001001         | 0.008919 |
| Tuberculosis                                 | 119             | 1.839826 | 0.001001         | 0.008919 |
| Chemokine signaling pathway                  | 97              | 1.65872  | 0.001002         | 0.008919 |
| Phagosome                                    | 88              | 2.058306 | 0.001003         | 0.008919 |
| Osteoclast differentiation                   | 94              | 1.846426 | 0.001003         | 0.008919 |
| Herpes simplex infection                     | 98              | 1.783689 | 0.001003         | 0.008919 |
| Influenza A                                  | 104             | 1.742874 | 0.001005         | 0.008919 |
| Toll-like receptor signaling pathway         | 72              | 1.659677 | 0.001006         | 0.008919 |
| TNF signaling pathway                        | 71              | 1.666449 | 0.001006         | 0.008919 |
| Toxoplasmosis                                | 76              | 1.756359 | 0.001007         | 0.008919 |
| Lysosome                                     | 75              | 1.69355  | 0.001008         | 0.008919 |
| Cell adhesion molecules (CAMs)               | 76              | 1.941922 | 0.001009         | 0.008919 |
| Platelet activation                          | 69              | 1.758676 | 0.001013         | 0.008919 |
| Systemic lupus erythematosus                 | 61              | 2.231625 | 0.001013         | 0.008919 |
| NF-kappa B signaling pathway                 | 60              | 1.810673 | 0.001015         | 0.008919 |
| Fc gamma R-mediated phagocytosis             | 49              | 1.805769 | 0.001016         | 0.008919 |
| Leukocyte transendothelial migration         | 61              | 1.797207 | 0.001016         | 0.008919 |
| Leishmaniasis                                | 58              | 2.116371 | 0.001017         | 0.008919 |
| Amoebiasis                                   | 56              | 1.760917 | 0.001017         | 0.008919 |
| Rheumatoid arthritis                         | 58              | 2.068267 | 0.001017         | 0.008919 |
| Complement and coagulation cascades          | 51              | 2.16162  | 0.001018         | 0.008919 |
| Antigen processing and presentation          | 39              | 2.093406 | 0.001025         | 0.008919 |
| Pertussis                                    | 52              | 1.881533 | 0.001026         | 0.008919 |
| Inflammatory bowel disease (IBD)             | 44              | 2.09334  | 0.001026         | 0.008919 |
| Hematopoietic cell lineage                   | 48              | 2.12388  | 0.001027         | 0.008919 |
| Viral myocarditis                            | 40              | 1.98547  | 0.001029         | 0.008919 |
| Legionellosis                                | 37              | 1.844959 | 0.001034         | 0.008919 |
| Staphylococcus aureus infection              | 40              | 2.442836 | 0.001035         | 0.008919 |
| Protein digestion and absorption             | 36              | 1.750502 | 0.001042         | 0.008919 |
| Type I diabetes mellitus                     | 31              | 1.930238 | 0.001043         | 0.008919 |
| Malaria                                      | 35              | 1.96528  | 0.001053         | 0.008919 |
| Autoimmune thyroid disease                   | 31              | 1.981315 | 0.001054         | 0.008919 |
| Allograft rejection                          | 28              | 1.969347 | 0.001055         | 0.008919 |
| Graft-versus-host disease                    | 28              | 2.040211 | 0.001056         | 0.008919 |
| Intestinal immune network for IgA production | 28              | 2.105781 | 0.001081         | 0.008919 |

|                                                      |     |          |          |          |
|------------------------------------------------------|-----|----------|----------|----------|
| Asthma                                               | 20  | 2.22251  | 0.001092 | 0.008919 |
| Primary immunodeficiency                             | 22  | 1.757746 | 0.001107 | 0.008919 |
| Proteoglycans in cancer                              | 119 | 1.525951 | 0.002002 | 0.014879 |
| Measles                                              | 81  | 1.553189 | 0.002016 | 0.014879 |
| Natural killer cell mediated cytotoxicity            | 65  | 1.66563  | 0.002026 | 0.014879 |
| Salmonella infection                                 | 48  | 1.656164 | 0.002047 | 0.014879 |
| Arachidonic acid metabolism                          | 23  | 1.789057 | 0.002183 | 0.015492 |
| Chagas disease (American trypanosomiasis)            | 71  | 1.564443 | 0.003033 | 0.021022 |
| NOD-like receptor signaling pathway                  | 42  | 1.590747 | 0.004124 | 0.027929 |
| RNA polymerase                                       | 9   | -2.49639 | 0.004695 | 0.03109  |
| AGE-RAGE signaling pathway in diabetic complications | 63  | 1.567282 | 0.005102 | 0.033052 |
| Basal transcription factors                          | 10  | -2.00994 | 0.005348 | 0.0336   |
| African trypanosomiasis                              | 19  | 1.697458 | 0.005488 | 0.0336   |
| Phototransduction                                    | 11  | -1.79203 | 0.005525 | 0.0336   |
| Mismatch repair                                      | 14  | -2.40018 | 0.007042 | 0.041972 |
| Pathogenic Escherichia coli infection                | 24  | 1.617733 | 0.007592 | 0.044083 |
| Prion diseases                                       | 18  | 1.702542 | 0.007692 | 0.044083 |
| Chemical carcinogenesis                              | 21  | 1.636773 | 0.008929 | 0.048812 |
| Epstein-Barr virus infection                         | 102 | 1.433865 | 0.008991 | 0.048812 |
| Ribosome biogenesis in eukaryotes                    | 21  | -2.48608 | 0.009009 | 0.048812 |
| Homologous recombination                             | 16  | -2.13096 | 0.009259 | 0.048933 |
| Glycine, serine and threonine metabolism             | 18  | -1.8508  | 0.009524 | 0.048933 |
| Nucleotide excision repair                           | 18  | -2.25299 | 0.009524 | 0.048933 |

**Supplementary Table S2. Gene set enrichment analysis of IGF-1-associated DEGs in RNA seq**

| <b>Enrichment gene set</b>                   | <b>Number of genes</b> | <b>NES</b> | <b>p. value</b> | <b>FDR</b> |
|----------------------------------------------|------------------------|------------|-----------------|------------|
| Cytokine-cytokine receptor interaction       | 138                    | 2.279413   | 0.000999        | 0.007576   |
| Chemokine signaling pathway                  | 94                     | 1.916094   | 0.001           | 0.007576   |
| Osteoclast differentiation                   | 76                     | 2.101744   | 0.001004        | 0.007576   |
| HTLV-I infection                             | 94                     | 1.608266   | 0.001005        | 0.007576   |
| Cell adhesion molecules (CAMs)               | 67                     | 2.078572   | 0.001007        | 0.007576   |
| Tuberculosis                                 | 81                     | 2.307253   | 0.001007        | 0.007576   |
| Neuroactive ligand-receptor interaction      | 60                     | 2.13638    | 0.001008        | 0.007576   |
| Influenza A                                  | 63                     | 1.895164   | 0.001008        | 0.007576   |
| Phagosome                                    | 67                     | 2.195085   | 0.001011        | 0.007576   |
| Jak-STAT signaling pathway                   | 58                     | 1.754604   | 0.001013        | 0.007576   |
| Herpes simplex infection                     | 56                     | 1.815455   | 0.001013        | 0.007576   |
| Natural killer cell mediated cytotoxicity    | 62                     | 1.667998   | 0.001014        | 0.007576   |
| Leishmaniasis                                | 48                     | 2.156925   | 0.001014        | 0.007576   |
| TNF signaling pathway                        | 51                     | 1.888268   | 0.001016        | 0.007576   |
| Chagas disease (American trypanosomiasis)    | 52                     | 2.02898    | 0.001017        | 0.007576   |
| Toxoplasmosis                                | 51                     | 2.061357   | 0.001017        | 0.007576   |
| Measles                                      | 52                     | 1.90941    | 0.001017        | 0.007576   |
| Rheumatoid arthritis                         | 55                     | 2.584394   | 0.001017        | 0.007576   |
| T cell receptor signaling pathway            | 53                     | 1.919773   | 0.001018        | 0.007576   |
| Staphylococcus aureus infection              | 44                     | 2.676677   | 0.001019        | 0.007576   |
| NF-kappa B signaling pathway                 | 53                     | 1.967894   | 0.00102         | 0.007576   |
| Toll-like receptor signaling pathway         | 49                     | 2.096833   | 0.001024        | 0.007576   |
| Hematopoietic cell lineage                   | 49                     | 2.492082   | 0.001025        | 0.007576   |
| Pertussis                                    | 37                     | 2.002893   | 0.001027        | 0.007576   |
| Complement and coagulation cascades          | 39                     | 1.956477   | 0.001029        | 0.007576   |
| Platelet activation                          | 39                     | 1.77833    | 0.001029        | 0.007576   |
| Intestinal immune network for IgA production | 35                     | 2.068319   | 0.001029        | 0.007576   |
| Fc gamma R-mediated phagocytosis             | 42                     | 1.626224   | 0.00103         | 0.007576   |
| Systemic lupus erythematosus                 | 37                     | 2.447137   | 0.001031        | 0.007576   |
| Inflammatory bowel disease (IBD)             | 41                     | 2.211229   | 0.001035        | 0.007576   |
| Salmonella infection                         | 35                     | 1.985182   | 0.001036        | 0.007576   |
| Amoebiasis                                   | 39                     | 1.974418   | 0.001037        | 0.007576   |
| NOD-like receptor signaling pathway          | 33                     | 1.985287   | 0.001038        | 0.007576   |
| Malaria                                      | 34                     | 1.927885   | 0.001045        | 0.007576   |
| Allograft rejection                          | 27                     | 2.076045   | 0.001053        | 0.007576   |

|                                                      |    |          |          |          |
|------------------------------------------------------|----|----------|----------|----------|
| Graft-versus-host disease                            | 30 | 2.22679  | 0.001053 | 0.007576 |
| Antigen processing and presentation                  | 35 | 2.07405  | 0.001057 | 0.007576 |
| Type I diabetes mellitus                             | 27 | 2.240893 | 0.001062 | 0.007576 |
| Autoimmune thyroid disease                           | 26 | 2.120768 | 0.001062 | 0.007576 |
| Primary immunodeficiency                             | 23 | 2.114043 | 0.001072 | 0.007576 |
| Asthma                                               | 21 | 2.206763 | 0.001076 | 0.007576 |
| Legionellosis                                        | 27 | 2.026849 | 0.001082 | 0.007576 |
| Prion diseases                                       | 13 | 2.006259 | 0.001151 | 0.007868 |
| Viral myocarditis                                    | 30 | 1.94959  | 0.002101 | 0.013842 |
| Inflammatory mediator regulation of TRP channels     | 33 | 1.668439 | 0.002119 | 0.013842 |
| Leukocyte transendothelial migration                 | 40 | 1.682727 | 0.003067 | 0.019605 |
| PI3K-Akt signaling pathway                           | 99 | 1.560282 | 0.004012 | 0.025097 |
| Homologous recombination                             | 7  | -2.22232 | 0.004255 | 0.026059 |
| African trypanosomiasis                              | 22 | 1.726979 | 0.004343 | 0.026059 |
| AGE-RAGE signaling pathway in diabetic complications | 42 | 1.587015 | 0.005123 | 0.029715 |
| Ribosome                                             | 7  | -2.15131 | 0.005155 | 0.029715 |
| B cell receptor signaling pathway                    | 44 | 1.626247 | 0.006166 | 0.034864 |
| DNA replication                                      | 12 | -2.65596 | 0.006536 | 0.036176 |
| Sulfur relay system                                  | 4  | -1.74039 | 0.006645 | 0.036176 |
| Arachidonic acid metabolism                          | 14 | 1.72016  | 0.006826 | 0.036467 |
| Transcriptional misregulation in cancer              | 66 | 1.515666 | 0.007049 | 0.036467 |
| Calcium signaling pathway                            | 45 | 1.569835 | 0.007128 | 0.036467 |
| Fanconi anemia pathway                               | 14 | -3.13049 | 0.007194 | 0.036467 |
| Terpenoid backbone biosynthesis                      | 5  | -1.93039 | 0.007491 | 0.037121 |
| Aminoacyl-tRNA biosynthesis                          | 13 | -2.6785  | 0.007576 | 0.037121 |
| Notch signaling pathway                              | 16 | -2.07943 | 0.008065 | 0.038513 |
| Apoptosis                                            | 49 | 1.566251 | 0.008122 | 0.038513 |
| RNA degradation                                      | 17 | -2.06507 | 0.009709 | 0.045307 |
| Epstein-Barr virus infection                         | 61 | 1.492075 | 0.010132 | 0.046543 |
| Cytosolic DNA-sensing pathway                        | 19 | 1.650428 | 0.011038 | 0.048756 |
| Rap1 signaling pathway                               | 60 | 1.49359  | 0.011089 | 0.048756 |
| Base excision repair                                 | 11 | -1.96842 | 0.011111 | 0.048756 |

**Supplementary Table S3. Differentially expressed miRNAs in TCGA database**

| <b>miRNA</b>   | <b>log2FC</b> | <b>p. value</b> | <b>FDR</b>  |
|----------------|---------------|-----------------|-------------|
| hsa-miR-9      | -0.89505488   | 9.91511E-09     | 7.56382E-07 |
| hsa-miR-9*     | -0.801860531  | 3.07865E-09     | 2.74E-07    |
| hsa-miR-182    | -0.520040014  | 0.00301651      | 0.019407427 |
| hsa-miR-181d   | -0.512222646  | 2.83765E-10     | 3.78826E-08 |
| hsa-miR-130b   | -0.458492634  | 2.92753E-07     | 1.737E-05   |
| hsa-miR-204    | -0.420631006  | 0.00983418      | 0.044884205 |
| hsa-miR-149    | -0.398294535  | 3.94079E-05     | 0.000861009 |
| hsa-miR-181c   | -0.376861655  | 2.64769E-06     | 0.000100991 |
| hsa-miR-20a    | -0.369237149  | 8.27248E-05     | 0.001472502 |
| hsa-miR-17-5p  | -0.350062953  | 1.48313E-05     | 0.000469051 |
| hsa-miR-93     | -0.344807768  | 1.22472E-06     | 5.45002E-05 |
| hsa-miR-19b    | -0.342828153  | 3.45563E-05     | 0.000802306 |
| hsa-miR-183    | -0.327498319  | 0.002036094     | 0.014306242 |
| hsa-miR-106a   | -0.32721886   | 0.000163754     | 0.002429024 |
| hsa-miR-106b   | -0.316848112  | 2.83898E-05     | 0.000689097 |
| hsa-miR-19a    | -0.315776869  | 0.000102707     | 0.001710394 |
| hsa-miR-551b   | -0.312841595  | 1.45087E-05     | 0.000469051 |
| hsa-miR-25     | -0.307063329  | 2.62907E-05     | 0.000668534 |
| hsa-miR-33     | -0.305311937  | 8.08515E-05     | 0.001472502 |
| hsa-miR-301    | -0.303310792  | 0.000873406     | 0.007737252 |
| hsa-miR-15b    | -0.28980843   | 0.000418426     | 0.004381168 |
| hsa-let-7i     | -0.252991091  | 0.00122461      | 0.009616786 |
| hsa-miR-92     | -0.251274319  | 0.000434037     | 0.004457222 |
| hsa-miR-20b    | -0.251075832  | 0.001858001     | 0.013228967 |
| hsa-miR-125b   | -0.238673545  | 0.001615363     | 0.01181649  |
| hsa-miR-454-3p | -0.232472121  | 2.60653E-06     | 0.000100991 |
| hsa-miR-181a   | -0.222000188  | 0.003428138     | 0.021715185 |
| hsa-miR-565    | -0.220520743  | 0.004836833     | 0.028077236 |
| hsa-miR-17-3p  | -0.216336442  | 0.000963495     | 0.007915486 |
| hsa-miR-95     | -0.205201536  | 1.58386E-05     | 0.000469051 |
| hsa-miR-181a*  | -0.200559554  | 0.00037471      | 0.004148142 |
| hsa-miR-130a   | -0.184068668  | 0.004837277     | 0.028077236 |
| hsa-miR-16     | -0.182300565  | 0.010627856     | 0.0469031   |
| hsa-miR-181b   | -0.175851135  | 0.01032699      | 0.045955105 |
| hsa-miR-30b    | -0.175289214  | 0.006870202     | 0.034263948 |

|                    |              |             |             |
|--------------------|--------------|-------------|-------------|
| hsa-miR-30d        | -0.175188028 | 0.002766672 | 0.018467536 |
| hsa-miR-32         | -0.153638252 | 0.002521558 | 0.017262971 |
| hsa-miR-550        | -0.153462014 | 1.66879E-05 | 0.000469051 |
| hsa-miR-450        | -0.144794001 | 0.000212428 | 0.002941594 |
| hsa-miR-542-3p     | -0.128116856 | 0.006812065 | 0.034263948 |
| hsa-miR-598        | -0.115803631 | 0.000883843 | 0.007737252 |
| hsa-miR-96         | -0.10187845  | 0.004028603 | 0.024727287 |
| hsa-miR-488        | -0.084468135 | 0.001153848 | 0.009335675 |
| hsa-miR-153        | -0.076731623 | 0.000940341 | 0.007915486 |
| hsa-miR-18b        | -0.074718248 | 0.006982506 | 0.034263948 |
| hsa-miR-182*       | -0.062012709 | 0.001550489 | 0.01166974  |
| hsa-miR-545        | -0.032940408 | 0.007771547 | 0.037053627 |
| hsa-miR-641        | -0.030947909 | 7.18755E-05 | 0.001421537 |
| hsa-miR-499        | -0.027057869 | 8.167E-05   | 0.001472502 |
| hsa-miR-579        | -0.025427128 | 4.38262E-05 | 0.000900122 |
| hsa-miR-302a*      | -0.020533989 | 0.008298005 | 0.039213582 |
| kshv-miR-K12-5     | -0.020334362 | 0.000449893 | 0.00453288  |
| ebv-miR-BART3-3p   | -0.019297105 | 0.000523408 | 0.005081818 |
| hsa-miR-597        | -0.019007001 | 0.000225853 | 0.002941594 |
| hsa-miR-580        | -0.018941888 | 0.000625094 | 0.005856145 |
| hsa-miR-573        | -0.018415073 | 0.000321386 | 0.003730873 |
| hsa-miR-559        | -0.018382157 | 0.000372557 | 0.004148142 |
| hsa-miR-556        | -0.017960333 | 0.000956099 | 0.007915486 |
| hcmv-miR-US25-2-3p | -0.01793193  | 0.003001006 | 0.019407427 |
| hsa-miR-33b        | -0.01786371  | 0.000200744 | 0.00289722  |
| hsa-miR-633        | -0.017682291 | 0.002963832 | 0.019407427 |
| hcmv-miR-UL22A*    | -0.01766213  | 0.000159874 | 0.002429024 |
| hsa-miR-496        | -0.016781127 | 0.000388403 | 0.004148142 |
| hsa-miR-620        | -0.01672721  | 0.004391412 | 0.026348471 |
| hsa-miR-384        | -0.016317267 | 0.001224114 | 0.009616786 |
| hsa-miR-220        | -0.016144928 | 0.007234846 | 0.034846307 |
| hsa-miR-208        | -0.015648167 | 0.003837745 | 0.023829717 |
| hsa-miR-643        | -0.015383828 | 0.000308152 | 0.003656738 |
| hsa-miR-578        | -0.015316231 | 0.005575525 | 0.030380921 |
| hsa-miR-553        | -0.015166803 | 0.005276751 | 0.02907767  |
| kshv-miR-K12-9     | -0.01496448  | 0.001551595 | 0.01166974  |
| ebv-miR-BHRF1-3    | -0.01492812  | 0.008693854 | 0.040369724 |



|                   |              |             |             |
|-------------------|--------------|-------------|-------------|
| hsa-miR-515-5p    | -0.014617979 | 0.006993952 | 0.034263948 |
| hsa-miR-581       | -0.014415158 | 0.005932817 | 0.031681241 |
| hsa-miR-651       | -0.013686581 | 0.003456537 | 0.021715185 |
| hsa-miR-588       | -0.012984329 | 0.006820564 | 0.034263948 |
| hsa-miR-587       | -0.012914183 | 0.005037457 | 0.028617045 |
| ebv-miR-BART8-5p  | -0.012662072 | 0.006779422 | 0.034263948 |
| hsa-miR-802       | -0.012340292 | 0.005153051 | 0.028965573 |
| hsa-miR-570       | -0.01181038  | 0.009967589 | 0.045107563 |
| hsa-miR-380-5p    | -0.011334969 | 0.007243333 | 0.034846307 |
| ebv-miR-BART11-5p | -0.010769692 | 0.006787556 | 0.034263948 |

**Supplementary Table S4. Differentially expressed miRNAs in IGF-1-treated U87-MG cells**

| <b>microRNA</b> | <b>log2FC</b> | <b>p. value</b> | <b>FDR</b>  |
|-----------------|---------------|-----------------|-------------|
| hsa-miR-4286    | -3.86340803   | 0.00119779      | 0.006247156 |
| hsa-miR-21-5p   | -3.776428643  | 0.000594439     | 0.004502231 |
| hsa-miR-4324    | -3.437377346  | 0.000307906     | 0.003782673 |
| hsa-miR-125b-5p | -3.422284867  | 1.33495E-05     | 0.002682766 |
| hsa-miR-1260a   | -3.412556675  | 0.001571108     | 0.007518829 |
| hsa-let-7f-5p   | -3.366008733  | 0.00168036      | 0.007760399 |
| hsa-miR-29a-3p  | -3.304596296  | 6.35696E-05     | 0.003044482 |
| hsa-miR-4284    | -3.260275033  | 0.00055489      | 0.004486486 |
| hsa-let-7a-5p   | -3.232767769  | 0.000937372     | 0.005291837 |
| hsa-let-7b-5p   | -3.125524163  | 2.111E-05       | 0.002682766 |
| hsa-miR-125a-5p | -3.123478916  | 0.000781895     | 0.005017908 |
| hsa-let-7c      | -3.032824745  | 0.000529879     | 0.004437741 |
| hsa-miR-16-5p   | -2.981460238  | 0.002514941     | 0.009735616 |
| hsa-miR-100-5p  | -2.973299209  | 0.000658154     | 0.004777104 |
| hsa-let-7d-5p   | -2.853225274  | 0.000181266     | 0.003432232 |
| hsa-miR-363-5p  | -2.738884166  | 0.016715958     | 0.031928946 |
| hsa-miR-99a-5p  | -2.72312379   | 0.001529296     | 0.007441435 |
| hsa-miR-4443    | -2.623173313  | 0.003651438     | 0.011867172 |
| hsa-miR-221-3p  | -2.595445936  | 0.00049295      | 0.004302863 |
| hsa-miR-1260b   | -2.586444374  | 0.001458975     | 0.007261525 |
| hsa-miR-27a-3p  | -2.481435069  | 0.002629342     | 0.009960573 |
| hsa-let-7e-5p   | -2.477183797  | 1.10477E-05     | 0.002682766 |
| hsa-miR-23a-3p  | -2.324290321  | 0.001012562     | 0.005581911 |
| hsa-miR-222-3p  | -2.305254565  | 0.002304791     | 0.009208592 |
| hsa-miR-4454    | -2.244617359  | 0.007240113     | 0.017713871 |
| hsa-miR-3135b   | -2.232321242  | 0.001044594     | 0.00568651  |
| hsa-miR-23b-3p  | -2.227350668  | 0.000176824     | 0.003422535 |
| hsa-miR-29c-3p  | -2.174050265  | 0.004426349     | 0.013155012 |
| hsa-miR-29b-3p  | -2.155169824  | 0.000267019     | 0.003666042 |
| hsa-miR-26a-5p  | -2.086770568  | 0.000262512     | 0.003666042 |
| hsa-miR-9-5p    | -2.076294635  | 8.09557E-05     | 0.003044482 |
| hsa-miR-4448    | -2.06797456   | 0.000196521     | 0.003461101 |
| hsa-miR-98-5p   | -2.054827895  | 2.2675E-05      | 0.002682766 |
| hsa-miR-92b-3p  | -2.017678006  | 0.000122348     | 0.003134271 |
| hsa-miR-27b-3p  | -1.960577536  | 0.000150992     | 0.003278479 |
| hsa-miR-181a-5p | -1.935316814  | 0.002730164     | 0.010076154 |

|                 |              |             |             |
|-----------------|--------------|-------------|-------------|
| hsa-miR-22-3p   | -1.926914886 | 0.00351834  | 0.011520579 |
| hsa-miR-5100    | -1.926163956 | 0.001918716 | 0.008273277 |
| hsa-let-7g-5p   | -1.86730921  | 0.001566908 | 0.007518829 |
| hsa-miR-92a-3p  | -1.862715225 | 0.000566921 | 0.004486486 |
| hsa-miR-10a-5p  | -1.794456723 | 0.000832806 | 0.005181244 |
| hsa-miR-19b-3p  | -1.782090645 | 0.003221341 | 0.010709113 |
| hsa-miR-15a-5p  | -1.766947629 | 1.28634E-05 | 0.002682766 |
| hsa-miR-4632-5p | -1.706269151 | 0.001421664 | 0.007147281 |
| hsa-miR-3676-5p | -1.687153286 | 0.002194069 | 0.00888853  |
| hsa-miR-17-5p   | -1.680264168 | 5.6506E-05  | 0.003044482 |
| hsa-miR-34a-5p  | -1.650560493 | 0.001083722 | 0.005862867 |
| hsa-miR-20a-5p  | -1.644807137 | 0.000188268 | 0.003461101 |
| hsa-miR-99b-5p  | -1.641297333 | 0.001739499 | 0.007932481 |
| hsa-miR-138-5p  | -1.621375455 | 4.3139E-05  | 0.003044482 |
| hsa-miR-4701-5p | -1.553542613 | 0.000319387 | 0.003782673 |
| hsa-miR-20b-5p  | -1.544410202 | 0.002829985 | 0.010102117 |
| hsa-miR-195-5p  | -1.521233384 | 0.000310382 | 0.003782673 |
| hsa-miR-24-3p   | -1.515682691 | 0.00532294  | 0.014718353 |
| hsa-miR-541-3p  | -1.497100677 | 0.003058193 | 0.010410386 |
| hsa-miR-4521    | -1.485060678 | 0.01421783  | 0.029138188 |
| hsa-miR-19a-3p  | -1.440796452 | 0.001766095 | 0.008011818 |
| hsa-miR-26b-5p  | -1.399364803 | 7.49382E-05 | 0.003044482 |
| hsa-miR-106a-5p | -1.390104092 | 0.000563079 | 0.004486486 |
| hsa-miR-4695-5p | -1.383013147 | 0.000716373 | 0.004935933 |
| hsa-miR-15b-5p  | -1.382991225 | 0.000273585 | 0.003666042 |
| hsa-miR-3607-5p | -1.352913327 | 3.97826E-05 | 0.003044482 |
| hsa-miR-30d-5p  | -1.335354945 | 1.78517E-05 | 0.002682766 |
| hsa-miR-3676-3p | -1.31081031  | 0.000925161 | 0.005291837 |
| hsa-miR-4633-5p | -1.306500155 | 0.008395189 | 0.019816286 |
| hsa-miR-193b-3p | -1.294100567 | 0.005295496 | 0.014718353 |
| hsa-miR-30a-5p  | -1.287130103 | 0.001610843 | 0.007584025 |
| hsa-miR-3651    | -1.271590325 | 0.019060474 | 0.035322708 |
| hsa-miR-766-3p  | -1.240387232 | 0.001111117 | 0.005929484 |
| hsa-miR-181b-5p | -1.228963832 | 0.000633946 | 0.004679385 |
| hsa-miR-34b-5p  | -1.224791916 | 0.005053764 | 0.014239154 |
| hsa-miR-130a-3p | -1.222573236 | 3.75034E-05 | 0.003044482 |
| hsa-miR-197-3p  | -1.209233768 | 0.002156279 | 0.008829628 |
| hsa-let-7i-5p   | -1.190042164 | 0.00158933  | 0.007523403 |

|                               |              |             |             |
|-------------------------------|--------------|-------------|-------------|
| hsa-miR-30e-5p                | -1.181722778 | 0.006101931 | 0.015817804 |
| hsa-miR-145-5p                | -1.177426322 | 0.000694282 | 0.004916417 |
| hsa-miR-4776-5p               | -1.170651667 | 0.000255127 | 0.003666042 |
| hsa-miR-1294                  | -1.154041341 | 0.006162205 | 0.015926648 |
| hsa-miR-4649-5p               | -1.110780785 | 0.000152854 | 0.003278479 |
| hsa-miR-30b-5p                | -1.110637914 | 0.005465431 | 0.014876219 |
| hsa-miR-3665                  | -1.080360439 | 0.002883697 | 0.010159519 |
| hsa-miR-4723-5p               | -1.077372548 | 0.014815888 | 0.029688384 |
| hsa-miR-4763-5p               | -1.076093049 | 0.002906113 | 0.01016556  |
| hsa-miR-668                   | -1.074891955 | 0.017841505 | 0.033563608 |
| hsa-miR-4323                  | -1.065304906 | 0.001939305 | 0.008302711 |
| hsa-miR-10b-5p                | -1.050837786 | 0.000255807 | 0.003666042 |
| hsa-miR-106b-5p               | -1.050182677 | 9.92011E-05 | 0.003044482 |
| hsa-miR-6511b-5p              | -1.04229023  | 0.000348389 | 0.003782673 |
| hsa-miR-933                   | -1.030042271 | 0.001692854 | 0.007760399 |
| hsa-miR-181c-5p               | -1.02915592  | 9.99939E-05 | 0.003044482 |
| hsa-miR-3607-3p               | -1.023779257 | 0.00180969  | 0.00812495  |
| hsa-miR-129-1-3p              | -1.00853249  | 0.00272957  | 0.010076154 |
| hsa-miR-423-3p                | -0.999612575 | 0.000742373 | 0.004935933 |
| hsa-miR-634                   | -0.981519145 | 0.000455007 | 0.004181275 |
| hsa-miR-1234-5p               | -0.973339061 | 0.007024008 | 0.017364068 |
| hsa-miR-4664-5p               | -0.970607605 | 0.001845455 | 0.008136079 |
| hsa-miR-129-2-3p              | -0.96533947  | 0.002802625 | 0.010102117 |
| hsa-miR-1248                  | -0.962132704 | 0.000586471 | 0.004486486 |
| hsa-miR-4313                  | -0.945802359 | 0.015983994 | 0.031145546 |
| hsa-miR-191-5p                | -0.943374766 | 0.000115348 | 0.003044482 |
| hsa-miR-4695-3p               | -0.940192413 | 0.008739506 | 0.020244972 |
| hsa-miR-151a-5p, hsa-miR-151b | -0.933713802 | 7.00968E-05 | 0.003044482 |
| hsa-miR-30c-5p                | -0.931248238 | 0.00694074  | 0.017223317 |
| hsa-miR-21-3p                 | -0.927805045 | 0.000309794 | 0.003782673 |
| hsa-miR-1229-3p               | -0.920418573 | 0.010480369 | 0.023194434 |
| hsa-miR-455-3p                | -0.919666023 | 0.000356444 | 0.003782673 |
| hsa-miR-93-5p                 | -0.915111792 | 0.000329055 | 0.003782673 |
| hsa-miR-107                   | -0.913596023 | 0.000937067 | 0.005291837 |
| hsa-miR-449b-3p               | -0.908959091 | 0.010701698 | 0.02353833  |
| hsa-miR-28-5p                 | -0.904848914 | 0.000192747 | 0.003461101 |
| hsa-miR-25-3p                 | -0.89108089  | 0.00036433  | 0.003782673 |
| hsa-miR-3622a-3p              | -0.862554327 | 0.000148741 | 0.003278479 |

|                                    |              |             |             |
|------------------------------------|--------------|-------------|-------------|
| hsa-miR-3620-3p                    | -0.844918513 | 0.00456786  | 0.013351028 |
| hsa-miR-3176                       | -0.822848895 | 0.003775917 | 0.012135881 |
| hsa-miR-1976                       | -0.822697181 | 0.000145405 | 0.003278479 |
| hsa-miR-1538                       | -0.818393194 | 4.08586E-05 | 0.003044482 |
| hsa-miR-4655-5p                    | -0.795534442 | 0.000250059 | 0.003666042 |
| hsa-miR-103a-3p                    | -0.774756177 | 0.003715618 | 0.011986307 |
| hsa-miR-718                        | -0.769012381 | 0.019727158 | 0.036249692 |
| hsa-miR-4534                       | -0.764419313 | 0.006531566 | 0.01639317  |
| hsa-miR-6511a-5p, hsa-miR-6511b-5p | -0.757325951 | 0.004352418 | 0.012982728 |
| hsa-miR-9-3p                       | -0.752434052 | 8.58655E-05 | 0.003044482 |
| hsa-miR-1234-3p                    | -0.743050216 | 0.000755242 | 0.004951375 |
| hsa-miR-4780                       | -0.711759781 | 0.001189597 | 0.006241803 |
| hsa-miR-181d                       | -0.690381932 | 0.000898423 | 0.005287342 |
| hsa-miR-1193                       | -0.685310254 | 0.007275196 | 0.017749317 |
| hsa-miR-4687-5p                    | -0.684400183 | 0.030037741 | 0.049739302 |
| hsa-miR-6511a-3p                   | -0.674797011 | 0.004988558 | 0.014199458 |
| hsa-miR-3621                       | -0.670900494 | 0.000198685 | 0.003461101 |
| hsa-miR-130b-3p                    | -0.665803971 | 0.000108169 | 0.003044482 |
| hsa-miR-6131                       | -0.661022776 | 0.000722941 | 0.004935933 |
| hsa-miR-4258                       | -0.653112689 | 0.008226694 | 0.019577734 |
| hsa-miR-5739                       | -0.651765914 | 0.00643948  | 0.016210368 |
| hsa-miR-4728-3p                    | -0.651722036 | 0.00268536  | 0.009995506 |
| hsa-miR-374a-5p                    | -0.649438381 | 0.021036835 | 0.038014695 |
| hsa-miR-361-5p                     | -0.641717555 | 0.00032352  | 0.003782673 |
| hsa-miR-5010-5p                    | -0.637630204 | 0.002681718 | 0.009995506 |
| hsa-miR-143-3p                     | -0.633588298 | 0.003819925 | 0.012187381 |
| hsa-miR-4253                       | -0.632515152 | 0.000224486 | 0.003620873 |
| hsa-miR-4713-5p                    | -0.629579768 | 0.004713903 | 0.013640562 |
| hsa-miR-1290                       | -0.623682249 | 0.004554033 | 0.013351028 |
| hsa-miR-4758-3p                    | -0.619041329 | 0.004509433 | 0.013290062 |
| hsa-miR-3180-5p                    | -0.617191311 | 0.002002636 | 0.008427568 |
| hsa-miR-4723-3p                    | -0.611246243 | 0.004252651 | 0.012816812 |
| hsa-miR-4446-3p                    | -0.593379927 | 0.008340213 | 0.019740014 |
| hsa-miR-424-5p                     | -0.590286123 | 0.003990323 | 0.012547188 |
| hsa-miR-125b-1-3p                  | -0.588281227 | 0.016645633 | 0.031864498 |
| hsa-miR-320d                       | -0.55929349  | 0.00180614  | 0.00812495  |
| hsa-miR-3184-3p                    | -0.557391432 | 0.005515287 | 0.014965155 |
| hsa-miR-6072                       | -0.557389738 | 0.003587862 | 0.011704225 |

|                  |              |             |             |
|------------------|--------------|-------------|-------------|
| hsa-miR-1238-3p  | -0.555987226 | 0.000247445 | 0.003666042 |
| hsa-miR-1292-3p  | -0.554908761 | 0.000674578 | 0.004826312 |
| hsa-miR-3182     | -0.549418348 | 0.009965084 | 0.022295263 |
| hsa-miR-6717-5p  | -0.542129695 | 0.000215362 | 0.003615686 |
| hsa-miR-4722-3p  | -0.535923066 | 0.011851756 | 0.025363341 |
| hsa-miR-4455     | -0.532698485 | 0.021301591 | 0.038413427 |
| hsa-miR-4290     | -0.513171182 | 0.00130108  | 0.006666124 |
| hsa-miR-6509-3p  | -0.510409745 | 0.000502405 | 0.004332622 |
| hsa-miR-22-5p    | -0.502375895 | 0.011913453 | 0.025432885 |
| hsa-miR-4712-3p  | -0.498820364 | 0.000407546 | 0.004033778 |
| hsa-miR-574-3p   | -0.498290747 | 0.000726974 | 0.004935933 |
| hsa-miR-3196     | -0.497596786 | 0.00031416  | 0.003782673 |
| hsa-miR-1228-3p  | -0.496275031 | 0.004440383 | 0.013155012 |
| hsa-miR-1224-3p  | -0.491207551 | 0.001999564 | 0.008427568 |
| hsa-miR-708-5p   | -0.487975565 | 0.000646589 | 0.004732598 |
| hsa-miR-4750-3p  | -0.486881063 | 0.002548677 | 0.009779286 |
| hsa-miR-18a-5p   | -0.475485356 | 0.007502064 | 0.018145201 |
| hsa-miR-3145-5p  | -0.468845049 | 0.001684294 | 0.007760399 |
| hsa-miR-3149     | -0.45889939  | 0.020217869 | 0.036763598 |
| hsa-miR-210      | -0.457755238 | 0.00026337  | 0.003666042 |
| hsa-miR-4499     | -0.457191003 | 0.015707211 | 0.030882576 |
| hsa-miR-3972     | -0.45489879  | 0.000840685 | 0.005193167 |
| hsa-miR-466      | -0.448831614 | 0.000558884 | 0.004486486 |
| hsa-miR-1233-3p  | -0.4369562   | 0.002827816 | 0.010102117 |
| hsa-miR-378a-3p  | -0.43364479  | 0.000620368 | 0.004618297 |
| hsa-miR-664a-3p  | -0.43042866  | 0.02904339  | 0.048452726 |
| hsa-miR-3940-3p  | -0.425767816 | 0.000884713 | 0.005253452 |
| hsa-miR-4769-3p  | -0.420174651 | 0.011143967 | 0.024326805 |
| hsa-miR-422a     | -0.411697467 | 0.02689241  | 0.045659433 |
| hsa-miR-484      | -0.399465674 | 0.003921822 | 0.012421479 |
| hsa-miR-1181     | -0.39216564  | 0.004757449 | 0.013720988 |
| hsa-miR-4301     | -0.391026742 | 0.025180886 | 0.043344965 |
| hsa-miR-2116-3p  | -0.390983859 | 0.00887405  | 0.020447877 |
| hsa-miR-378g     | -0.389762788 | 0.000580157 | 0.004486486 |
| hsa-miR-3622b-5p | -0.387109378 | 0.022099032 | 0.039202152 |
| hsa-miR-486-5p   | -0.383129963 | 0.000456052 | 0.004181275 |
| hsa-miR-186-5p   | -0.382360931 | 0.00279372  | 0.010102117 |
| hsa-miR-4725-5p  | -0.380189406 | 0.005791083 | 0.015616203 |

|                                  |              |             |             |
|----------------------------------|--------------|-------------|-------------|
| hsa-miR-374b-5p                  | -0.374718178 | 0.000738983 | 0.004935933 |
| hsa-miR-151a-3p                  | -0.374718178 | 0.000738983 | 0.004935933 |
| hsa-miR-3173-5p                  | -0.370731155 | 0.000479555 | 0.004262166 |
| hsa-miR-335-5p                   | -0.369550669 | 0.000545326 | 0.004486486 |
| hsa-miR-4646-3p                  | -0.357950598 | 0.004235161 | 0.012808422 |
| hsa-miR-3174                     | -0.357941898 | 0.000564857 | 0.004486486 |
| hsa-miR-532-3p                   | -0.357928492 | 0.016225484 | 0.031270783 |
| hsa-miR-365a-3p, hsa-miR-365b-3p | -0.356710442 | 0.003976656 | 0.012547188 |
| hsa-miR-6722-3p                  | -0.35403017  | 0.002794441 | 0.010102117 |
| hsa-miR-885-3p                   | -0.352658815 | 0.005972197 | 0.015636783 |
| hsa-miR-3177-3p                  | -0.351964688 | 0.002159255 | 0.008829628 |
| hsa-miR-6124                     | -0.350543679 | 0.001907736 | 0.008266858 |
| hsa-miR-4436b-5p                 | -0.341380847 | 0.019522084 | 0.035971118 |
| hsa-miR-4429                     | -0.33821777  | 0.012543126 | 0.026646494 |
| hsa-miR-378i                     | -0.331780048 | 0.004895105 | 0.013979135 |
| hsa-miR-4787-3p                  | -0.331482506 | 0.001031467 | 0.005650363 |
| hsa-miR-4456                     | -0.329640672 | 0.00654974  | 0.01639317  |
| hsa-miR-146b-5p                  | -0.325158119 | 0.003368177 | 0.011112433 |
| hsa-miR-320e                     | -0.323957349 | 0.027826867 | 0.046880467 |
| hsa-miR-29b-1-5p                 | -0.323267737 | 0.002792004 | 0.010102117 |
| hsa-miR-1470                     | -0.322663127 | 0.01474776  | 0.029688384 |
| hsa-miR-140-3p                   | -0.319891532 | 0.001103411 | 0.005929484 |
| hsa-miR-18b-5p                   | -0.314995307 | 0.001944607 | 0.008302711 |
| hsa-miR-320a                     | -0.314157806 | 0.000878231 | 0.005253452 |
| hsa-miR-6125                     | -0.310746289 | 0.001900939 | 0.008266858 |
| hsa-miR-4717-5p                  | -0.302209895 | 0.004868512 | 0.013948928 |
| hsa-miR-5193                     | -0.300626883 | 0.002105413 | 0.008750386 |
| hsa-miR-6511b-3p                 | -0.297716559 | 0.022178812 | 0.03926371  |
| hsa-miR-625-5p                   | -0.297217468 | 0.007330019 | 0.017783973 |
| hsa-miR-339-5p                   | -0.291632856 | 0.002854139 | 0.010146755 |
| hsa-miR-142-3p                   | -0.287058421 | 0.001185492 | 0.006241803 |
| hsa-miR-664b-3p                  | -0.284720114 | 0.002681304 | 0.009995506 |
| hsa-miR-378c                     | -0.28163533  | 0.004043    | 0.012621695 |
| hsa-miR-125b-2-3p                | -0.279853041 | 0.014816836 | 0.029688384 |
| hsa-miR-221-5p                   | -0.273183512 | 0.002543223 | 0.009779286 |
| hsa-miR-491-3p                   | -0.26781382  | 0.006213297 | 0.015979272 |
| hsa-miR-6716-3p                  | -0.261223008 | 0.005432673 | 0.014876219 |
| hsa-miR-101-3p                   | -0.260618452 | 0.011742411 | 0.025191231 |

|                 |              |             |             |
|-----------------|--------------|-------------|-------------|
| hsa-miR-887     | -0.257388825 | 0.020435013 | 0.037081033 |
| hsa-miR-1225-3p | -0.254073737 | 0.005957564 | 0.015636783 |
| hsa-miR-23c     | -0.252474854 | 0.026299415 | 0.044827379 |
| hsa-miR-4685-3p | -0.244029769 | 0.013380352 | 0.027946464 |
| hsa-miR-6508-5p | -0.24348429  | 0.021471728 | 0.038498649 |
| hsa-miR-378f    | -0.221954673 | 0.008485657 | 0.019868299 |
| hsa-miR-378e    | -0.219060556 | 0.003054888 | 0.010410386 |
| hsa-miR-1236-3p | -0.213997019 | 0.021828909 | 0.03888135  |
| hsa-miR-6514-3p | -0.213990801 | 0.005067896 | 0.014239154 |
| hsa-miR-877-3p  | -0.207381942 | 0.016192364 | 0.031270783 |
| hsa-let-7a-3p   | -0.20166135  | 0.006349106 | 0.01607579  |
| hsa-miR-7-5p    | -0.187983287 | 0.005448599 | 0.014876219 |
| hsa-miR-132-3p  | -0.185301761 | 0.005369633 | 0.014753786 |
| hsa-miR-4745-5p | -0.182819703 | 0.005858856 | 0.015636783 |
| hsa-miR-1914-5p | -0.175848869 | 0.006435813 | 0.016210368 |
| hsa-miR-378d    | -0.16411938  | 0.005570158 | 0.015067105 |
| hsa-miR-345-5p  | -0.161368051 | 0.007182186 | 0.017621645 |
| hsa-miR-3146    | -0.158814942 | 0.014812483 | 0.029688384 |
| hsa-miR-302c-5p | -0.15266972  | 0.013541072 | 0.028014901 |
| hsa-miR-5089-3p | -0.139658877 | 0.016263679 | 0.031270783 |
| hsa-miR-185-5p  | -0.134905408 | 0.01616727  | 0.031270783 |
| hsa-miR-129-5p  | -0.134408379 | 0.015344666 | 0.030375463 |
| hsa-miR-148b-3p | -0.132206828 | 0.024503095 | 0.042514335 |
| hsa-miR-1227-3p | -0.126303139 | 0.016261188 | 0.031270783 |
| hsa-miR-503-5p  | -0.111563714 | 0.023518202 | 0.041216003 |
| hsa-miR-4641    | -0.111034673 | 0.020683933 | 0.037454689 |
| hsa-miR-3166    | -0.096756258 | 0.030191723 | 0.049899413 |



**Supplementary Table S5. The correlation analysis between miRNAs and genes of cytokine and cytokine receptor interaction**

| <b>Gene</b>                    | <b>Correlation</b> | <b><i>p</i> value</b> |
|--------------------------------|--------------------|-----------------------|
| <b>miR-9-5p-trageted genes</b> |                    |                       |
| IL1R2                          | -0.36738           | < E-16                |
| TGFBR2                         | -0.33934           | 1.78E-15              |
| CCR1                           | -0.33128           | 9.33E-15              |
| CXCL9                          | -0.1928            | 9.72E-06              |
| GHR                            | -0.0964            | 0.028096              |
| <b>miR-9-3p-trageted genes</b> |                    |                       |
| IL10RA                         | -0.35876           | <E-16                 |
| TGFBR2                         | -0.32266           | 4.86E-14              |
| CSF2RB                         | -0.27791           | 1.17E-10              |
| GHR                            | -0.08798           | 0.045135              |
| <b>miR-130b-trageted genes</b> |                    |                       |
| TGFBR2                         | -0.49218           | 3.55E-15              |

**Supplementary Table S6. Statistical calculations for high IGF-1/low miRNA status**

| <b>Covariate</b>                      | <b>Hazard Ratio</b> | <b>95%<br/>Conf-U</b> | <b>95%<br/>Conf-L</b> | <b>stdErr</b> | <b><i>p</i>. value</b> |
|---------------------------------------|---------------------|-----------------------|-----------------------|---------------|------------------------|
| <b>High IGF-1/Low miR-9-5p status</b> |                     |                       |                       |               |                        |
| High IGF-1/<br>Low miR-9-5p           | 1.224               | 1.672                 | 0.896                 | 0.159         | 0.203                  |
| G-CIMP                                | 2.786               | 5.372                 | 1.445                 | 0.335         | 0.002                  |
| Age > 60                              | 1.362               | 1.867                 | 0.993                 | 0.155         | 0.054                  |
| Karnofsky score $\geq$ 80             | 2.457               | 3.469                 | 1.740                 | 0.176         | <0.001                 |
| Gender (male)                         | 1.054               | 1.437                 | 0.773                 | 0.158         | 0.748                  |
| <b>High IGF-1/Low miR-9-3p status</b> |                     |                       |                       |               |                        |
| High IGF-1/<br>Low miR-9-3p           | 1.456               | 2.028                 | 1.045                 | 0.169         | 0.026                  |
| G-CIMP                                | 2.695               | 5.777                 | 1.257                 | 0.389         | 0.011                  |
| Age > 60                              | 1.274               | 1.733                 | 0.937                 | 0.157         | 0.124                  |
| Karnofsky score $\geq$ 80             | 2.012               | 2.886                 | 1.403                 | 0.184         | <0.001                 |
| Gender (male)                         | 1.023               | 1.428                 | 0.733                 | 0.170         | 0.978                  |
| <b>High IGF-1/Low miR-130b status</b> |                     |                       |                       |               |                        |
| High IGF-1/<br>Low miR-130b           | 1.24                | 1.707                 | 0.901                 | 0.163         | 0.187                  |
| G-CIMP                                | 4.38                | 8.82                  | 2.175                 | 0.357         | <0.001                 |
| Age > 60                              | 1.941               | 2.745                 | 1.372                 | 0.177         | <0.001                 |
| Karnofsky score $\geq$ 80             | 1.756               | 2.514                 | 1.226                 | 0.183         | 0.002                  |
| Gender (male)                         | 0.908               | 1.253                 | 0.658                 | 0.164         | 0.556                  |

**Supplementary Table S7. Survival analysis of miR-181d- or miR-9-3p-targeted genes**

| <b>Gene</b> | <b>Target miRNA</b> | <b>Hazard Ratio</b> | <b>SD of log intensities</b> | <b><i>p</i> value</b> |
|-------------|---------------------|---------------------|------------------------------|-----------------------|
| IL10RA      | miR-181d, miR-9-3p  | 1.111               | 1.129                        | 0.0123275             |
| CSF2RB      | miR-181d, miR-9-3p  | 1.144               | 0.895                        | 0.0142532             |
| IL7R        | miR-181d            | 1.078               | 0.948                        | 0.0860837             |
| TGFBR2      | miR-181d, miR-9-3p  | 1.086               | 0.68                         | 0.239493              |
| IL1R1       | miR-181d            | 1.07                | 0.626                        | 0.382742              |
| CXCL9       | miR-181d            | 1.029               | 1.398                        | 0.426054              |
| IL2RB       | miR-181d            | 1.066               | 0.57                         | 0.438288              |
| GHR         | miR-181d, miR-9-3p  | 0.971               | 1.038                        | 0.549928              |
| CXCL12      | miR-181d            | 0.976               | 1.032                        | 0.631965              |

SD of log intensities : standard deviation of the log 2 of the gene expression level

**Supplementary Table S8. Primer list**

| <b>Primer name</b>               | <b>Sequence</b>                           |
|----------------------------------|-------------------------------------------|
| <b>For miR-181d gene cloning</b> |                                           |
| miR-181d-clon-F                  | ACAGAATTCAACATTCAACCTGTCGGTGAG            |
| miR-181d-clon-R                  | ACAGGATCCCCAACCCTCTAATATTTAGTC            |
| <b>For 3'UTR cloning</b>         |                                           |
| CCR1-3UTR-F                      | TATCTCGAGGACCATAGGAGGCCAACCCA             |
| CCR1-3UTR-R                      | ATCTCTAGAATTCCAAGAGCCCAAATCCT             |
| IL1B -3UTR-F                     | TATCTCGAGTGTGCTGAATGTGGACTCAATCCCTAGGGCTG |
| IL1B -3UTR-R                     | ATCTCTAGACTTCAGTGAAGTTTATTCAGAACCA        |
| <b>For 3'UTR Mutagenesis</b>     |                                           |
| CCR1-3UMUT-F                     | ACTTGGGATAGAGAGGGCCGACAATGGTGGCCTGGGGCTT  |
| CCR1-3UMUT-R                     | AAGCCCCAGGCCACCATTGTCGGCCCTCTCTATCCCAAGT  |
| IL1B -3UMUT-F                    | TATCTCGAGTGTGCTGCCGACGGACTCAATCCCTAGGGCTG |
| <b>For real-time PCR</b>         |                                           |
| IL1B -sybr-F                     | ATGATGGCTTATTACAGTGGCAA                   |
| IL1B -sybr-R                     | GTCGGAGATTCGTAGCTGGA                      |
| CCR1-sybr-F                      | GACTATGACACGACCACAGAGT                    |
| CCR1-sybr-R                      | CCAACCAGGCCAATGACAAATA                    |
| GAPDH-sybr-F                     | GTG AAG GTC GGA GTC AAC                   |
| GAPDH-sybr-R                     | GTT GAG GTC AAT GAA GGG                   |

# Supplementary Figure S1

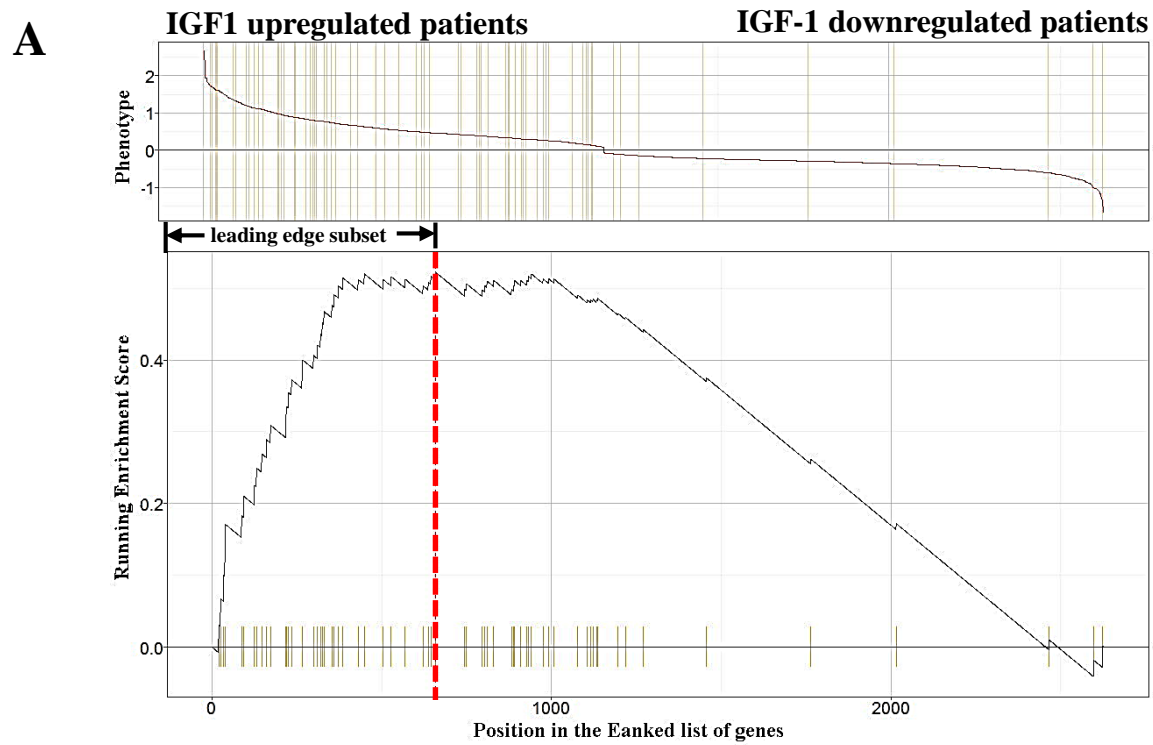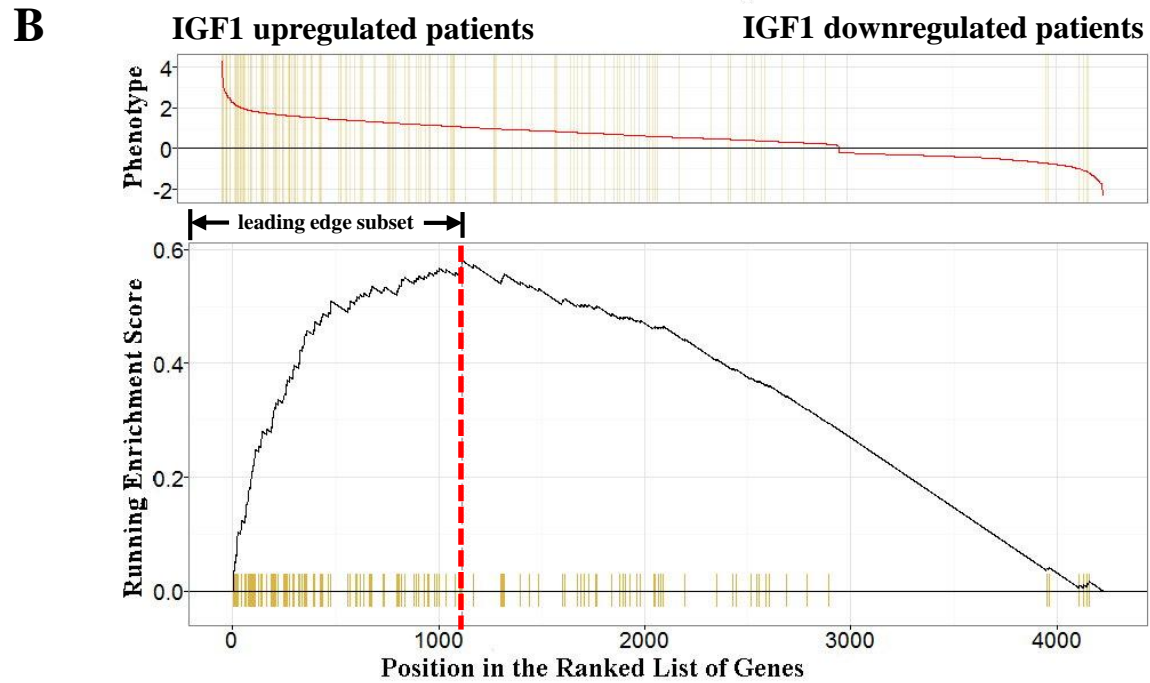

**Supplementary Figure S2**

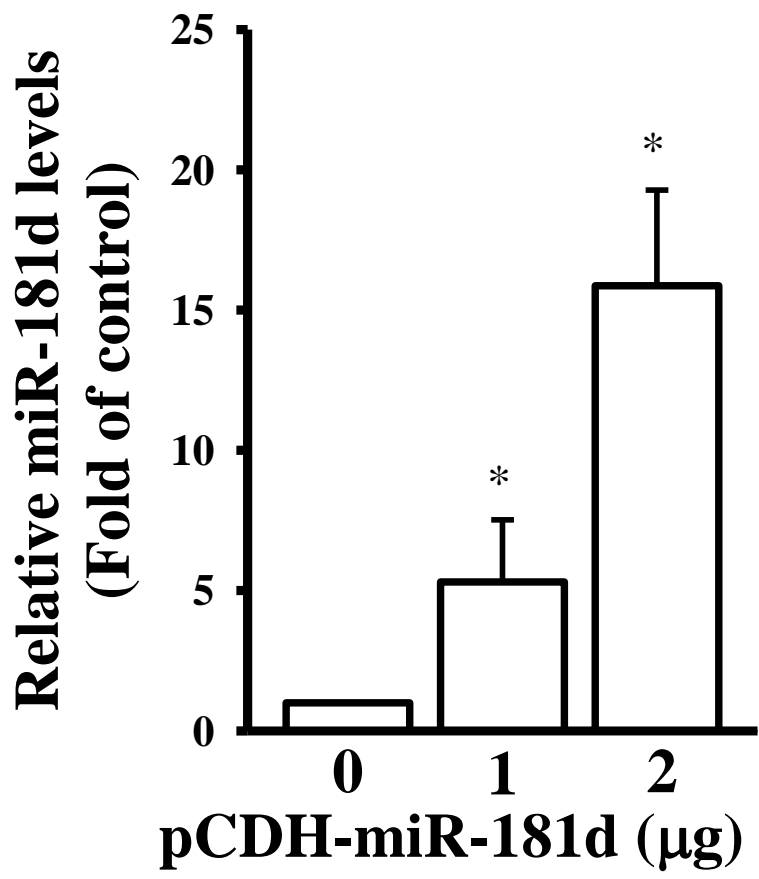

# Supplementary Figure S3

**A**

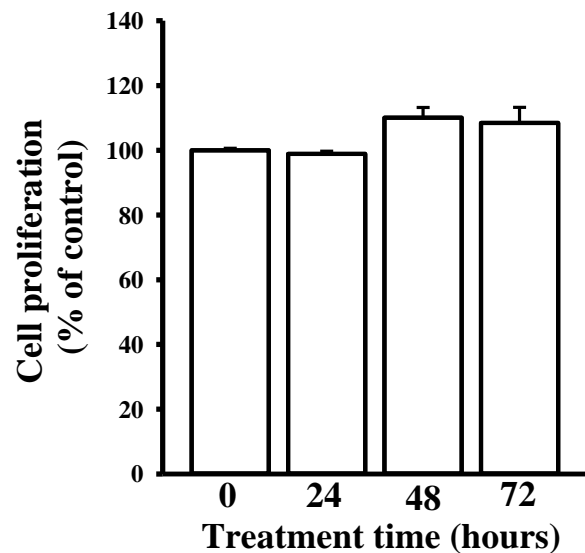

**B**

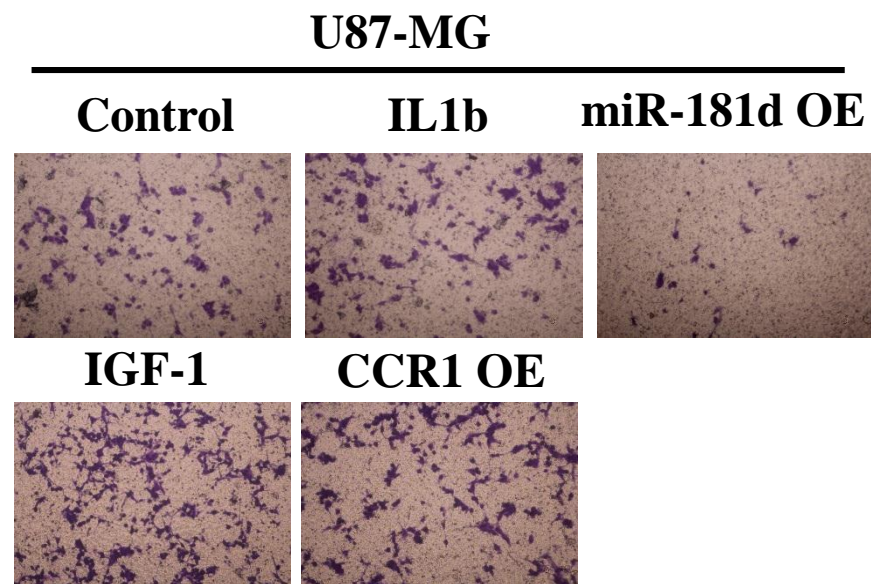

**C**

**M059K**

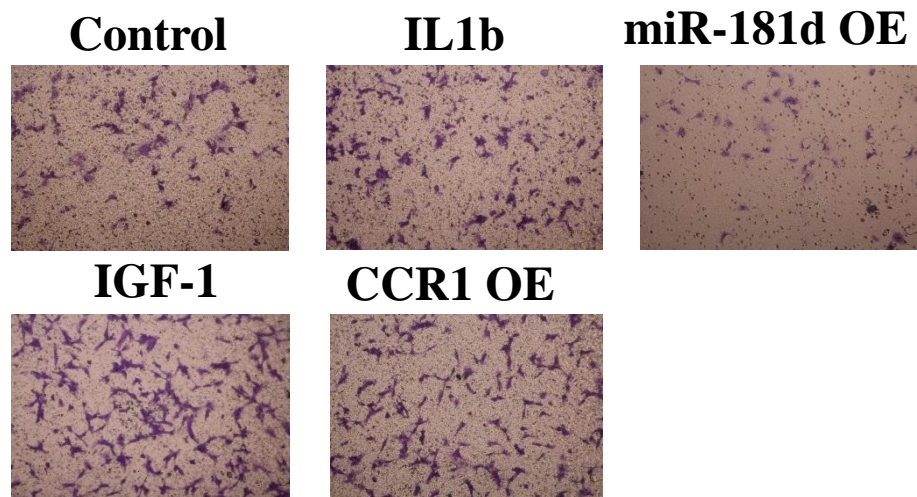

**D**

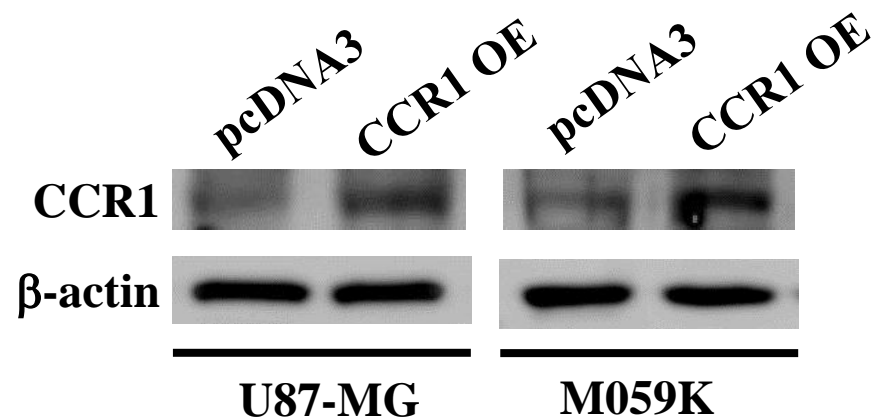

Supplement: 41598_2017_826_MOESM2_ESM.pdf [file 41598_2017_826_MOESM2_ESM.pdf]
